# Supplementary material
Source: PubMed Central journal article supplement (PMC2935634)
Supplement: tlo0305_0307SD1.pdf [file tlo0305_0307SD1.pdf]

**Table W1.** Review of Preclinical Imaging Using Trastuzumab to Target HER-2.

| Imaging Modality                                        | Imaging Agent                                                                                                                                                   | <i>In Vitro/In Vivo:</i><br>Cell Lines Used                                                                                                   | Dose                                                                        | Route      | Reference       |
|---------------------------------------------------------|-----------------------------------------------------------------------------------------------------------------------------------------------------------------|-----------------------------------------------------------------------------------------------------------------------------------------------|-----------------------------------------------------------------------------|------------|-----------------|
| Nuclear medicine<br>PET                                 | <sup>64</sup> Cu-DOTA-Herceptin                                                                                                                                 | <i>In vivo</i> (mice): BT-474,                                                                                                                | 4 MBq                                                                       | i.v.       | [41]            |
|                                                         | <sup>68</sup> Ga-DOTA-F(ab') <sub>2</sub>                                                                                                                       | MCF-7, MDA-MB-468<br>(s.c.)                                                                                                                   | 309 MBq                                                                     |            |                 |
| SPECT/CT                                                | <sup>89</sup> Zr-trastuzumab                                                                                                                                    | <i>In vivo</i> (mice): SKOV3,<br>GLC4 (s.c.)                                                                                                  | 100 µg of trastuzumab,<br>1 MBq                                             | i.v.       | [42]            |
|                                                         | <sup>111</sup> In-DOTA-Fab4D5,<br><sup>111</sup> In-DOTA-AB.Fab4D5                                                                                              | <i>In vivo</i> (mice): tumors<br>cells derived from<br>MMTV/HER-2<br>transgenic mice (s.c.)                                                   | 4 mg/kg (300-500 µCi)<br>25 MBq (30 µg)                                     | i.v.       | [43]<br>[44–46] |
| Scintigraphy<br>(whole body)                            | [ <sup>99m</sup> Tc]-HYNIC-trastuzumab Fab,<br><sup>111</sup> In-trastuzumab Fab,<br><sup>111</sup> In-DTPA-trastuzumab                                         | <i>In vivo</i> (mice): BT474,<br>SK-OV-3 (s.c.)<br><i>In vivo</i> (mice, humans)                                                              | 3.7 MBq (30 µg)<br>Mice: 450 ± 25 kBq (25 µg);<br>human: 100-150 MBq (5 mg) | i.v.       |                 |
| Scintillation counter<br>(tissue/cells)                 | <sup>111</sup> In-DOTA-Herceptin,<br><sup>111</sup> In-DOTA-F(ab') <sub>2</sub> ,<br><sup>111</sup> In-CHX-A -DTPA-Herceptin,<br><sup>90</sup> Y-DTPA-Herceptin | <i>In vivo</i> (mice): BT474 (s.c.)<br><i>In vitro</i> : MCF-7, SKBr-3                                                                        | 1.6 MBq                                                                     | i.v.       | [41]            |
| Magnetic resonance<br>tomography                        | WSIO-Herceptin                                                                                                                                                  | <i>In vivo</i> (mice): NIH3T6.7 (s.c.)                                                                                                        | 400 µg of Fe                                                                | i.v.       | [47,48]         |
|                                                         | Biotinylated Herceptin with<br>streptavidin-SPIO microbeads                                                                                                     | <i>In vitro</i> : MCF-7, MDA-MB-231,<br>AU-565 (gel phantoms)                                                                                 | 2-50 × 10 <sup>10</sup> biotin/µl                                           |            |                 |
| Optoacoustic tomography                                 | Herceptin nanoparticles                                                                                                                                         | <i>In vivo</i> (mice): SKBr3, KB                                                                                                              | 20 µmol/kg                                                                  | i.v.       | [49]<br>[50]    |
|                                                         | Herceptin conjugated with gold<br>nanoparticles (MabNP)                                                                                                         | <i>In vitro</i> : SKBR3, BT-474,<br>MDA-MB-231, and MCF-7                                                                                     | 10 <sup>9</sup> Mab/NP                                                      |            |                 |
| Optical imaging<br>Fluorescence imaging                 | Cy5.5-labeled Herceptin                                                                                                                                         | <i>In vitro</i> : SK-BR-3,<br>L6 rat myoblasts                                                                                                | 100 µg                                                                      | i.v.       | [51]            |
|                                                         | Herceptin-RhodG                                                                                                                                                 | <i>In vivo</i> (mice): SK-BR-3,<br>PE/CA-PJ34 (s.c.)                                                                                          | 50 µg in 200 µl of PBS                                                      | i.v.       | [52]            |
|                                                         | Tra-Cy5.5 (SQ)<br>Tra-Alexa680(SQ)                                                                                                                              | <i>In vivo</i> (mice): 3T3/HER-2+,<br>Balb/3T3/HER-2- (s.c.)                                                                                  | 50 µg/100 µl of PBS                                                         | i.v.       | [53]            |
| Fluorescence quantum dots                               | Trastuzumab-Qdots                                                                                                                                               | <i>In vivo</i> (mice): 3T3/HER-2+,<br>Balb/3T3/HER-2-<br><i>In vivo</i> (mice), <i>Ex vivo</i> (tumor from mice):<br>KPL-4, MBA-MB-231 (s.c.) | 2 µM (100 µl), 5-6 µm<br>tissue sections stained with 10 nM                 | i.v.       | [54,55]         |
| Dual-labeled imaging<br>agents (nuclear<br>and optical) | ( <sup>111</sup> In-DTPA) <sub>n</sub> -trastuzumab-(IRDye800) <sub>m</sub>                                                                                     | <i>In vitro</i> : SKBr3 and MDA-MB-231<br><i>In vivo</i> : SKBr3-luc (s.c.)                                                                   | 80-200 µg (70-200 µCi)                                                      | i.v., i.d. | [10,14]         |

i.v. indicates intravenous; s.c., subcutaneous; i.d., intradermal.
